# Supplementary material for: Acute intermittent hypoxia and rehabilitative training following cervical spinal injury alters neuronal hypoxia- and plasticity-associated protein expression
Source: PLoS One. 2018 May 18;13(5):e0197486. doi: 10.1371/journal.pone.0197486 (PMC5959066; doi:10.1371/journal.pone.0197486)
Supplement: S5 Table — (XLSX) [file pone.0197486.s005.xlsx]

## Sheet: Forelimb Day-7
phosphotrkB Arranged Data
Forelimb Normoxia Day-7
ForeLimb N-Day-7 (IHC-11-48)	Cyto Ave.Gray	Avg Background Gray	Cyto Avg. Gray-Background		Forelimb Normoxia Day-7	Forelimb Hypoxia Day-7
	71.32	28.18	43.14		36.64	82.71
	60.1	28.18	31.92		33.44	89.26
	57.31	28.18	29.13		47	90.54
	73.65	28.18	45.47
	66.38	28.18	38.2
	70.05	28.18	41.87
	73.17	28.18	44.99
	52.63	28.18	24.45
	60.79	28.18	32.61
	70.63	28.18	42.45
ForeLimb N-Day-7 (IHC-11-50)	74.26	27.65	46.61
	63.47	27.65	35.82
	58.82	27.65	31.17
	67.16	27.65	39.51
	65.41	27.65	37.76
	54.15	27.65	26.5
	71.81	27.65	44.16
	61.45	27.65	33.8
	53.38	27.65	25.73
	65.24	27.65	37.59
MEAN			36.644
ForeLimb N-Day-7 (IHC-12-5)	53.74	30.21	23.53
	67.56	30.21	37.35
	58.01	30.21	27.8
	69.15	30.21	38.94
	64.36	30.21	34.15
	69.03	30.21	38.82
	48.87	30.21	18.66
	72.8	30.21	42.59
	58.81	30.21	28.6
	74.12	30.21	43.91
ForeLimb N-Day-7 (IHC-12-7)	72.47	29.15	43.32
	65.3	29.15	36.15
	51.57	29.15	22.42
	67.06	29.15	37.91
	65.82	29.15	36.67
	49.71	29.15	20.56
	51.33	29.15	22.18
	65.21	29.15	36.06
	64.16	29.15	35.01
	73.34	29.15	44.19
MEAN			33.441
ForeLimb N-Day-7 (IHC-13-4)	64.72	21.54	43.18
	74.65	21.54	53.11
	65.44	21.54	43.9
	69.5	21.54	47.96
	60.64	21.54	39.1
	77.96	21.54	56.42
	73.59	21.54	52.05
	67.24	21.54	45.7
	75.07	21.54	53.53
	65.29	21.54	43.75
	57.15	21.54	35.61
ForeLimb N-Day-7 (IHC-13-6)	61.2	21.33	39.87
	71.37	21.33	50.04
	69.42	21.33	48.09
	65.17	21.33	43.84
	70.56	21.33	49.23
	76.71	21.33	55.38
	63.89	21.33	42.56
	67.34	21.33	46.01
	65.49	21.33	44.16
	74.91	21.33	53.58
MEAN			47.0033
Forelimb Hypoxia Day-7
ForeLimb IH-Day-7 (IHC-11-48)	123.52	28.34	95.18
	120.48	28.34	92.14
	112.18	28.34	83.84
	84.45	28.34	56.11
	114.52	28.34	86.18
	124.36	28.34	96.02
	111.67	28.34	83.33
	91.64	28.34	63.3
	115.75	28.34	87.41
	106.42	28.34	78.08
	112.6	28.34	84.26
ForeLimb IH-Day-7 (IHC-11-50)	120.97	27.95	93.02
	95.31	27.95	67.36
	116.59	27.95	88.64
	123.12	27.95	95.17
	119.65	27.95	91.7
	113.46	27.95	85.51
	111.52	27.95	83.57
	108.49	27.95	80.54
	98.11	27.95	70.16
	103.38	27.95	75.43
MEAN			82.7119
ForeLimb IH-Day-7 (IHC-12-5)	122.74	26.85	95.89
	124.73	26.85	97.88
	118.5	26.85	91.65
	97.82	26.85	70.97
	125.4	26.85	98.55
	89.59	26.85	62.74
	126.78	26.85	99.93
	118.47	26.85	91.62
	129.37	26.85	102.52
	124.81	26.85	97.96
	108.46	26.85	81.61
ForeLimb IH-Day-7 (IHC-12-7)	125.27	27.32	97.95
	96.88	27.32	69.56
	109.57	27.32	82.25
	129.23	27.32	101.91
	118.56	27.32	91.24
	120.91	27.32	93.59
	128.34	27.32	101.02
	116.25	27.32	88.93
	107.35	27.32	80.03
	122.31	27.32	94.99
	98.43	27.32	71.11
MEAN			89.2682
ForeLimb IH-Day-7 (IHC-13-4)	124.05	25.25	98.8
	121.57	25.25	96.32
	93.09	25.25	67.84
	134.29	25.25	109.04
	121.26	25.25	96.01
	134.14	25.25	108.89
	110.64	25.25	85.39
	92.57	25.25	67.32
	111.08	25.25	85.83
ForeLimb IH-Day-7 (IHC-13-6)	113.72	25.25	88.47
	121.94	26.15	95.79
	92.57	26.15	66.42
	117.69	26.15	91.54
	110.51	26.15	84.36
	131.83	26.15	105.68
	91.64	26.15	65.49
	119.17	26.15	93.02
	128.29	26.15	102.14
	123.2	26.15	97.05
	131.69	26.15	105.54
MEAN			90.547

## Sheet: Forelimb Day-1
phosphotrkB Arranged Data
Forelimb Normoxia Day-1
ForeLimb N-Day-1(IHC-11-48)	Cyto Ave.Gray	Avg Background Gray	Cyto Avg. Gray-Background		Forelimb Normoxia Day-1	Forelimb Hypoxia Day-1
	62.89	26.12	36.77		40.91	57.11
	52.91	26.12	26.79		52.39	61.01
	72.72	26.12	46.6		46.72	53.64
	78.18	26.12	52.06
	62.16	26.12	36.04
	76.54	26.12	50.42
	75.53	26.12	49.41
	55.57	26.12	29.45
	69.65	26.12	43.53
	73.27	26.12	47.15
ForeLimb N-Day-1(IHC-11-50)	53.45	25.73	27.72
	50.18	25.73	24.45
	79.66	25.73	53.93
	66.49	25.73	40.76
	73.53	25.73	47.8
	65.17	25.73	39.44
	71.38	25.73	45.65
	78.13	25.73	52.4
	57.41	25.73	31.68
	70.37	25.73	44.64
	58.23	25.73	32.5
MEAN			40.9138
ForeLimb N-Day-1(IHC-12-5)	79.01	29.76	49.25
	82.11	29.76	52.35
	83.09	29.76	53.33
	69.26	29.76	39.5
	71.64	29.76	41.88
	92.35	29.76	62.59
	93.61	29.76	63.85
	89.35	29.76	59.59
	97.19	29.76	67.43
	80.68	29.76	50.92
ForeLimb N-Day-1(IHC-12-7)	96.07	30.44	65.63
	84.95	30.44	54.51
	72.12	30.44	41.68
	70.73	30.44	40.29
	91.34	30.44	60.9
	71.47	30.44	41.03
	82.23	30.44	51.79
	79.89	30.44	49.45
	67.42	30.44	36.98
	95.29	30.44	64.85
MEAN			52.39
ForeLimb N-Day-1(IHC-13-4)	55.22	18.32	36.9
	69.05	18.32	50.73
	68.33	18.32	50.01
	72.23	18.32	53.91
	61.45	18.32	43.13
	65.32	18.32	47
	59.45	18.32	41.13
	64.62	18.32	46.3
	72.46	18.32	54.14
	58.05	18.32	39.73
ForeLimb N-Day-1(IHC-13-6)	57.36	17.1	40.26
	61.47	17.1	44.37
	68.54	17.1	51.44
	63.19	17.1	46.09
	58.08	17.1	40.98
	69.64	17.1	52.54
	67.32	17.1	50.22
	76.57	17.1	59.47
	59.45	17.1	42.35
	70.51	17.1	53.41
	54.24	17.1	37.14
MEAN			46.7262
Forelimb Hypoxia Day-1
ForeLimb IH-Day-1 (IHC-11-48)	85.9	25.78	60.12
	83.47	25.78	57.69
	78.01	25.78	52.23
	89.64	25.78	63.86
	86.59	25.78	60.81
	72.17	25.78	46.39
	89.36	25.78	63.58
	97.63	25.78	71.85
	94.93	25.78	69.15
	65.22	25.78	39.44
ForeLimb IH-Day-1 (IHC-11-50)	98.48	25.13	73.35
	84.53	25.13	59.4
	76.91	25.13	51.78
	90.24	25.13	65.11
	92.77	25.13	67.64
	64.61	25.13	39.48
	73.33	25.13	48.2
	66.71	25.13	41.58
	71.25	25.13	46.12
	89.57	25.13	64.44
MEAN			57.111
ForeLimb IH-Day-1 (IHC-12-5)	97.69	27.44	70.25
	81.61	27.44	54.17
	75.86	27.44	48.42
	101.03	27.44	73.59
	89.39	27.44	61.95
	80.64	27.44	53.2
	98.56	27.44	71.12
	72.48	27.44	45.04
	106.87	27.44	79.43
	83.32	27.44	55.88
ForeLimb IH-Day-1 (IHC-12-7)	73.11	28.06	45.05
	84.26	28.06	56.2
	100.31	28.06	72.25
	70.46	28.06	42.4
	104.04	28.06	75.98
	97.37	28.06	69.31
	95.21	28.06	67.15
	87.56	28.06	59.5
	93.63	28.06	65.57
	96.35	28.06	68.29
	74.63	28.06	46.57
MEAN			61.0152
ForeLimb IH-Day-1 (IHC-13-4)	63.52	19.13	44.39
	71.94	19.13	52.81
	57.95	19.13	38.82
	74.11	19.13	54.98
	68.48	19.13	49.35
	91.41	19.13	72.28
	75.17	19.13	56.04
	84.51	19.13	65.38
	68.36	19.13	49.23
	69.24	19.13	50.11
ForeLimb IH-Day-1 (IHC-13-6)	73.17	20.49	52.68
	84.05	20.49	63.56
	66.96	20.49	46.47
	77.18	20.49	56.69
	79.49	20.49	59
	87.25	20.49	66.76
	62.42	20.49	41.93
	60.17	20.49	39.68
	71.64	20.49	51.15
	90.33	20.49	69.84
	65.91	20.49	45.42
MEAN			53.6462

## Sheet: Hindlimb Day-7
phosphotrkB Arranged Data
Hindlimb Normoxia Day-7
HindLimb N-Day-7 (IHC-11-48)	Cyto Ave.Gray	Avg Background Gray	Cyto Avg. Gray-Background		Hindlimb Normoxia Day-7	Hindlimb Hypoxia Day-7
	82.33	31.65	50.68		44.7	82.51
	80.23	31.65	48.58		56.51	90.33
	70.4	31.65	38.75		60.49	76.38
	62.55	31.65	30.9
	74.36	31.65	42.71
	91.38	31.65	59.73
	83.56	31.65	51.91
	65.78	31.65	34.13
	76.28	31.65	44.63
	79.03	31.65	47.38
	76.81	31.65	45.16
	66.45	31.65	34.8
	73.28	31.65	41.63
	84.33	31.65	52.68
HindLimb N-Day-7 (IHC-11-50)	60.72	30.42	30.3
	72.29	30.42	41.87
	83.18	30.42	52.76
	82.11	30.42	51.69
	79.09	30.42	48.67
	70.43	30.42	40.01
	71.18	30.42	40.76
	92.33	30.42	61.91
	68.55	30.42	38.13
	80.67	30.42	50.25
	76.33	30.42	45.91
	69.24	30.42	38.82
	72.58	30.42	42.16
MEAN			44.7004
HindLimb N-Day-7 (IHC-12-5)	71.49	28.09	43.4
	87.48	28.09	59.39
	74.77	28.09	46.68
	86.83	28.09	58.74
	82.36	28.09	54.27
	60.29	28.09	32.2
	92.47	28.09	64.38
	78.93	28.09	50.84
	80.59	28.09	52.5
	97.26	28.09	69.17
	91.1	28.09	63.01
	82.45	28.09	54.36
	94.89	28.09	66.8
	102.53	28.09	74.44
HindLimb N-Day-7 (IHC-12-7)	77.94	29.71	48.23
	91.41	29.71	61.7
	83.19	29.71	53.48
	84.21	29.71	54.5
	98.15	29.71	68.44
	66.63	29.71	36.92
	83.37	29.71	53.66
	92.95	29.71	63.24
	80.42	29.71	50.71
	96.61	29.71	66.9
	104.6	29.71	74.89
	72.38	29.71	42.67
	85.46	29.71	55.75
	90.78	29.71	61.07
MEAN			56.5121
HindLimb N-Day-7 (IHC-13-4)	88.26	25.07	63.19
	72.77	25.07	47.7
	106.4	25.07	81.33
	73.99	25.07	48.92
	99.21	25.07	74.14
	87.71	25.07	62.64
	81.03	25.07	55.96
	85.17	25.07	60.1
	78.56	25.07	53.49
	76.63	25.07	51.56
	87.82	25.07	62.75
	74.96	25.07	49.89
	82.17	25.07	57.1
HindLimb N-Day-7 (IHC-13-6)	83.33	24.48	58.85
	79.24	24.48	54.76
	92.46	24.48	67.98
	81.39	24.48	56.91
	87.55	24.48	63.07
	96.49	24.48	72.01
	81.25	24.48	56.77
	83.77	24.48	59.29
	78.35	24.48	53.87
	75.64	24.48	51.16
	93.21	24.48	68.73
	103.46	24.48	78.98
	86.31	24.48	61.83
MEAN			60.4992
Hindlimb Hypoxia Day-7
HindLimb IH-Day-7 (IHC-11-48)	137.23	32.62	104.61
	123.37	32.62	90.75
	108.04	32.62	75.42
	93.27	32.62	60.65
	111.19	32.62	78.57
	88.51	32.62	55.89
	110.07	32.62	77.45
	125.22	32.62	92.6
	142.29	32.62	109.67
	117.36	32.62	84.74
	97.63	32.62	65.01
	125.93	32.62	93.31
	115.22	32.62	82.6
	129.48	32.62	96.86
HindLimb IH-Day-7 (IHC-11-50)	84.53	31.21	53.32
	114.96	31.21	83.75
	106.24	31.21	75.03
	110.97	31.21	79.76
	115.35	31.21	84.14
	109.31	31.21	78.1
	97.24	31.21	66.03
	118.65	31.21	87.44
	113.46	31.21	82.25
	129.24	31.21	98.03
	138.91	31.21	107.7
	140.43	31.21	109.22
	92.52	31.21	61.31
	107.35	31.21	76.14
MEAN			82.5125
HindLimb IH-Day-7 (IHC-12-5)	116.19	29.44	86.75
	103.73	29.44	74.29
	126.61	29.44	97.17
	125.38	29.44	95.94
	113.34	29.44	83.9
	106.34	29.44	76.9
	132.51	29.44	103.07
	134.07	29.44	104.63
	118.12	29.44	88.68
	124.96	29.44	95.52
	111.15	29.44	81.71
	98.22	29.44	68.78
	119.35	29.44	89.91
	126.45	29.44	97.01
HindLimb IH-Day-7 (IHC-12-7)	111.16	30.26	80.9
	123.28	30.26	93.02
	117.22	30.26	86.96
	124.49	30.26	94.23
	129.78	30.26	99.52
	127.47	30.26	97.21
	132.35	30.26	102.09
	130.69	30.26	100.43
	121.91	30.26	91.65
	94.67	30.26	64.41
	116.69	30.26	86.43
	121.56	30.26	91.3
	136.84	30.26	106.58
MEAN			90.333
HindLimb IH-Day-7 (IHC-13-4)	97.49	26.71	70.78
	104.31	26.71	77.6
	98.02	26.71	71.31
	86.65	26.71	59.94
	107.27	26.71	80.56
	112.86	26.71	86.15
	101.84	26.71	75.13
	109.11	26.71	82.4
	95.16	26.71	68.45
	103.41	26.71	76.7
	108.91	26.71	82.2
	99.53	26.71	72.82
	110.26	26.71	83.55
	98.79	26.71	72.08
HindLimb IH-Day-7 (IHC-13-6)	110.96	27.15	83.81
	112.23	27.15	85.08
	104.78	27.15	77.63
	117.69	27.15	90.54
	96.64	27.15	69.49
	99.82	27.15	72.67
	108.24	27.15	81.09
	105.77	27.15	78.62
	92.64	27.15	65.49
	116.26	27.15	89.11
	101.93	27.15	74.78
	85.24	27.15	58.09
MEAN			76.3873

## Sheet: Hindlimb Day-1
phosphotrkB Arranged Data
Hindlimb Normoxia Day-1
HindLimb N-Day-1 (IHC-11-48)	Cyto Ave.Gray	Avg Background Gray	Cyto Avg. Gray-Background		Hindlimb Normoxia Day-1	Hindlimb Hypoxia Day-1
	64.62	18.51	46.11		44.14	45.65
	62.97	18.51	44.46		45.65	63.45
	73.91	18.51	55.4		51.48	50.76
	56.96	18.51	38.45
	67.35	18.51	48.84
	59.2	18.51	40.69
	67.7	18.51	49.19
	51.44	18.51	32.93
	60.83	18.51	42.32
	66.12	18.51	47.61
	61.12	18.51	42.61
	64.53	18.51	46.02
	59.87	18.51	41.36
	48.28	18.51	29.77
HindLimb N-Day-1 (IHC-11-50)	63.85	17.75	46.1
	65.33	17.75	47.58
	61.17	17.75	43.42
	52.28	17.75	34.53
	65.86	17.75	48.11
	54.25	17.75	36.5
	60.17	17.75	42.42
	72.35	17.75	54.6
	63.28	17.75	45.53
	73.62	17.75	55.87
	57.29	17.75	39.54
	62.09	17.75	44.34
	65.34	17.75	47.59
MEAN			44.1441
HindLimb N-Day-1 (IHC-12-5)	64.52	20.86	43.66
	76.26	20.86	55.4
	69.75	20.86	48.89
	63.87	20.86	43.01
	70.59	20.86	49.73
	61.06	20.86	40.2
	53.77	20.86	32.91
	57.47	20.86	36.61
	78.27	20.86	57.41
	60.98	20.86	40.12
	65.67	20.86	44.81
	63.53	20.86	42.67
	66.2	20.86	45.34
	67.08	20.86	46.22
HindLimb N-Day-1 (IHC-12-7)	63.22	21.47	41.75
	68.47	21.47	47
	71.15	21.47	49.68
	62.06	21.47	40.59
	54.37	21.47	32.9
	78.72	21.47	57.25
	65.06	21.47	43.59
	72.39	21.47	50.92
	79.87	21.47	58.4
	68.21	21.47	46.74
	59.98	21.47	38.51
	64.14	21.47	42.67
	77.29	21.47	55.82
MEAN			45.6593
HindLimb N-Day-1 (IHC-13-4)	85.77	25.12	60.65
	58.6	25.12	33.48
	83.09	25.12	57.97
	92.52	25.12	67.4
	101.08	25.12	75.96
	58.24	25.12	33.12
	68.17	25.12	43.05
	82.16	25.12	57.04
	63.23	25.12	38.11
	79.24	25.12	54.12
	63.38	25.12	38.26
	72.11	25.12	46.99
	86.56	25.12	61.44
HindLimb N-Day-1 (IHC-13-6)	69.26	26.29	42.97
	103.64	26.29	77.35
	81.39	26.29	55.1
	73.53	26.29	47.24
	79.25	26.29	52.96
	97.19	26.29	70.9
	60.27	26.29	33.98
	72.75	26.29	46.46
	83.18	26.29	56.89
	57.35	26.29	31.06
	76.72	26.29	50.43
	70.21	26.29	43.92
	87.96	26.29	61.67
MEAN			51.4815
Hindlimb Hypoxia Day-1
HindLimb IH-Day-1 (IHC-11-48)	73.32	21.13	52.19
	70.62	21.13	49.49
	55.24	21.13	34.11
	86.16	21.13	65.03
	69.37	21.13	48.24
	62.25	21.13	41.12
	63.38	21.13	42.25
	55.73	21.13	34.6
	75.84	21.13	54.71
	59.28	21.13	38.15
	72.94	21.13	51.81
	69.33	21.13	48.2
	54.51	21.13	33.38
HindLimb IH-Day-1 (IHC-11-50)	61.21	21.85	39.36
	72.44	21.85	50.59
	83.85	21.85	62
	69.35	21.85	47.5
	76.72	21.85	54.87
	68.21	21.85	46.36
	56.32	21.85	34.47
	84.89	21.85	63.04
	55.78	21.85	33.93
	70.34	21.85	48.49
	53.09	21.85	31.24
	54.28	21.85	32.43
	73.55	21.85	51.7
	65.39	21.85	43.54
MEAN			45.6593
HindLimb IH-Day-1 (IHC-12-5)	124.36	30.76	93.6
	101.18	30.76	70.42
	94.74	30.76	63.98
	112.06	30.76	81.3
	58.56	30.76	27.8
	98.45	30.76	67.69
	77.99	30.76	47.23
	100.1	30.76	69.34
	86.39	30.76	55.63
	58.63	30.76	27.87
	112.56	30.76	81.8
	70.99	30.76	40.23
	121	30.76	90.24
HindLimb IH-Day-1 (IHC-12-7)	123.05	29.62	93.43
	101.57	29.62	71.95
	93.09	29.62	63.47
	84.29	29.62	54.67
	121.26	29.62	91.64
	80.68	29.62	51.06
	89.53	29.62	59.91
	110.26	29.62	80.64
	78.59	29.62	48.97
	94.66	29.62	65.04
	59.17	29.62	29.55
	67.15	29.62	37.53
	114.43	29.62	84.81
MEAN			63.4538
HindLimb IH-Day-1 (IHC-13-4)	82.48	27.75	54.73
	70.33	27.75	42.58
	112.04	27.75	84.29
	68.41	27.75	40.66
	72.59	27.75	44.84
	75.24	27.75	47.49
	102.88	27.75	75.13
	75.693	27.75	47.943
	77.32	27.75	49.57
	66.9	27.75	39.15
	52.77	27.75	25.02
	89.74	27.75	61.99
	64.53	27.75	36.78
HindLimb IH-Day-1 (IHC-13-6)	71.38	26.92	44.46
	78.91	26.92	51.99
	69.18	26.92	42.26
	103.52	26.92	76.6
	71.06	26.92	44.14
	88.56	26.92	61.64
	72.48	26.92	45.56
	109.87	26.92	82.95
	73.32	26.92	46.4
	67.21	26.92	40.29
	55.16	26.92	28.24
	90.31	26.92	63.39
	68.75	26.92	41.83
MEAN			50.7663

## Sheet: Complete phosphotrkB data
phosphotrkB Complete data
Hindlimb
	Hindlimb Normoxia Day-1	HindLimb Hypoxia Day-1	Hindlimb Normoxia Day-7	Hindlimb Hypoxia Day-7
	44.14	45.65	44.7	82.51
	45.65	63.45	56.51	90.33
	51.48	50.76	60.49	76.38
Average	47.09	53.2867	53.9	83.0733
SD	3.87609	9.16504	8.21219	6.99204
SEM	2.24052	5.29771	4.74693	4.04164
Forelimb
	Forelimb Normoxia Day-1	Forelimb Hpoxia Day-1	Forelimb Normoxia Day-7	Forelimb Hypoxia Day-7
	40.91	57.11	36.64	82.71
	52.39	61.01	33.44	89.26
	46.72	53.64	47	90.54
Average	46.6733	57.2533	39.0267	87.5033
SD	5.74014	3.68709	7.08806	4.20019
SEM	3.318	2.13127	4.09714	2.42786
